# Supplementary material for: Effect of Ar on Temperature and Flow Distribution in Monocrystalline Graphene Growth: Inert Gas Is Active
Source: PubMed Central journal article supplement — ACS Omega. 2024 Dec 16;9(52):51146–56. doi: 10.1021/acsomega.4c06728 (PMC11696439; doi:10.1021/acsomega.4c06728), 2024-12-16
Supplement: ao4c06728_si_001.pdf [file ao4c06728_si_001.pdf]

---

# Effect of Ar on temperature and flow distribution in monocrystalline graphene growth: inert gas is active

*Peng Wang<sup>1</sup>, Dong Wang<sup>2</sup>, Chengmin Chen<sup>2,3</sup>, Li Sun<sup>1,\*</sup>, Xue Zhang<sup>1</sup>, Xing Guo<sup>1</sup>, Fapeng Yu<sup>1</sup>, Xiufeng Cheng<sup>1</sup>, Xuejian Xie<sup>1</sup>, Xian Zhao<sup>1,\*</sup>*

1. State Key Lab of Crystal Materials, Institute of Novel Semiconductors, and Center for Optics Research and Engineering Shandong University, Jinan, 250100, PR China

2. Energy Institute, Qilu University of Technology (Shandong Academy of Sciences), Jinan, 250100, PR China

3. Jinan Key Laboratory of High Performance Industrial Software, Jinan Institute of Supercomputing Technology, Jinan 250100, China

\*Corresponding author: [sdusunli@sdu.edu.cn](mailto:sdusunli@sdu.edu.cn) (L. Sun), [xianzhao@sdu.edu.cn](mailto:xianzhao@sdu.edu.cn) (X. Zhao)

---

Fig. S1 showed the optical microscopy images under different Ar flow rates. the images were taken at lowest magnification of optical microscopy in our lab. Indeed, when the Ar flow rate was set to 500 sccm and 400 sccm, due to the lower nucleation density (Fig. 5b), only one graphene domain can be observed in the OM image even at the lowest magnification, as shown in Figure S1e-f.

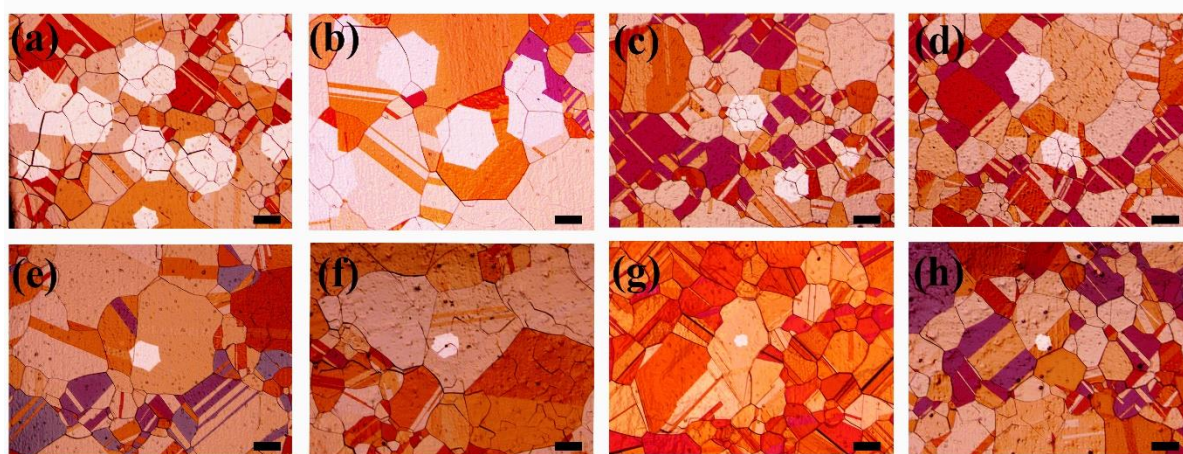

**Figure S1.** OM images of Graphene domain under different Ar flow rates. (a-b): 200 sccm; (c-d): 300 sccm; (e-f): 400 sccm; (g-h): 500 sccm. Scale bars are 200  $\mu\text{m}$ .

---

Fig. S2 showed the OM images at different locations under three Ar-regulation methods. Clearly, the morphology and size of graphene domains synthesized on copper substrates at various locations are uniformly consistent, and method M3 achieved a lower nucleation density and the highest crystal growth rate.

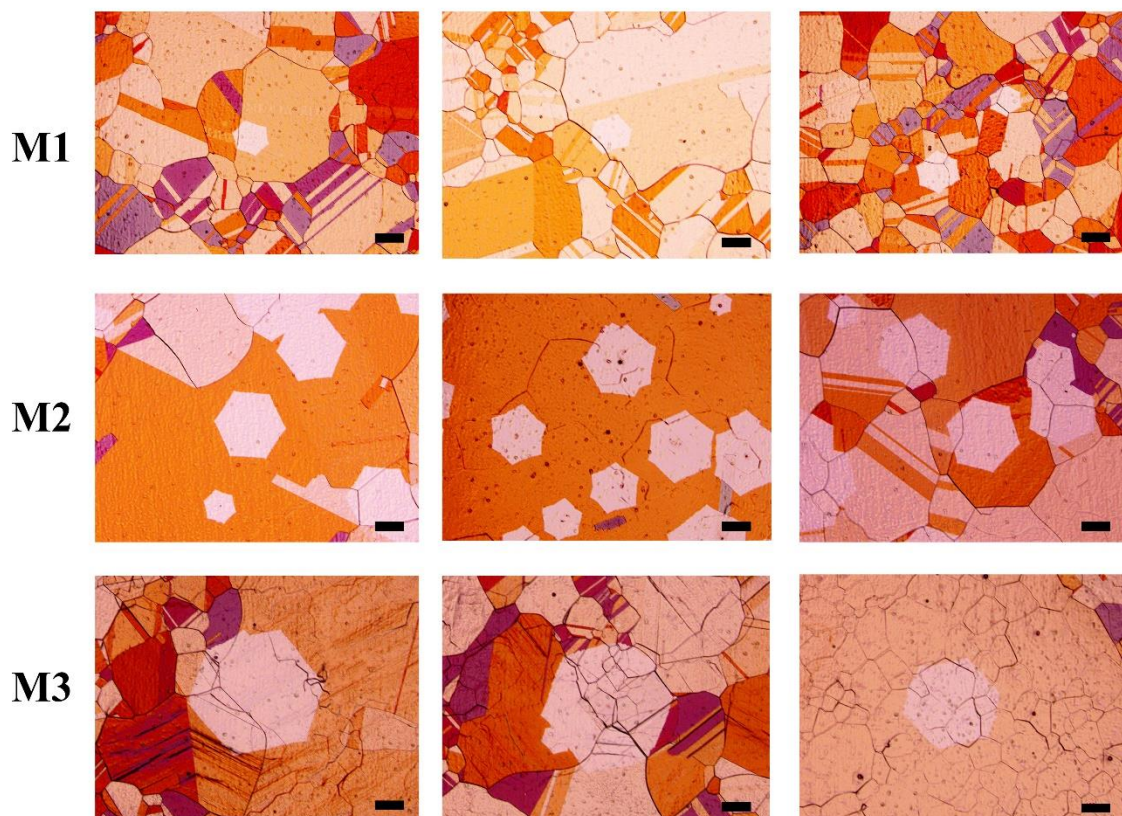

**Figure S2.** OM images of Graphene domain under different Ar-regulation methods. Scale bars are 200  $\mu\text{m}$ .

---

Fig. S3 showed the SEM characterization of millimeter size domain of graphene. The enlarged detail image from the red square frame area as shown in Figure S3b, the angle between the domain edges is almost  $120^\circ$ , which is a typical morphological feature of monocrystalline graphene.

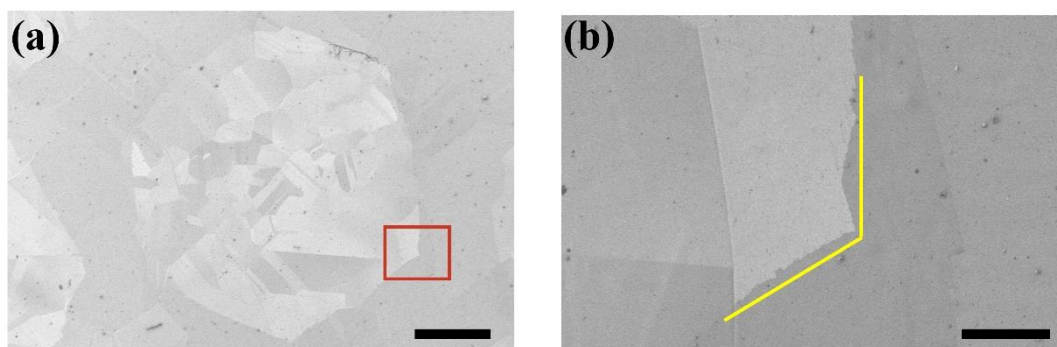

**Figure S3.** (a) SEM images of monocrystalline Graphene domain by M3, the growth time was 120 min. (b) Enlarged SEM image within the red square frame in (a). Scale bars are  $400\ \mu\text{m}$  and  $100\ \mu\text{m}$ , respectively.
